# Supplementary material
Source: PubMed Central journal article supplement (PMC4946145)

Figure 5

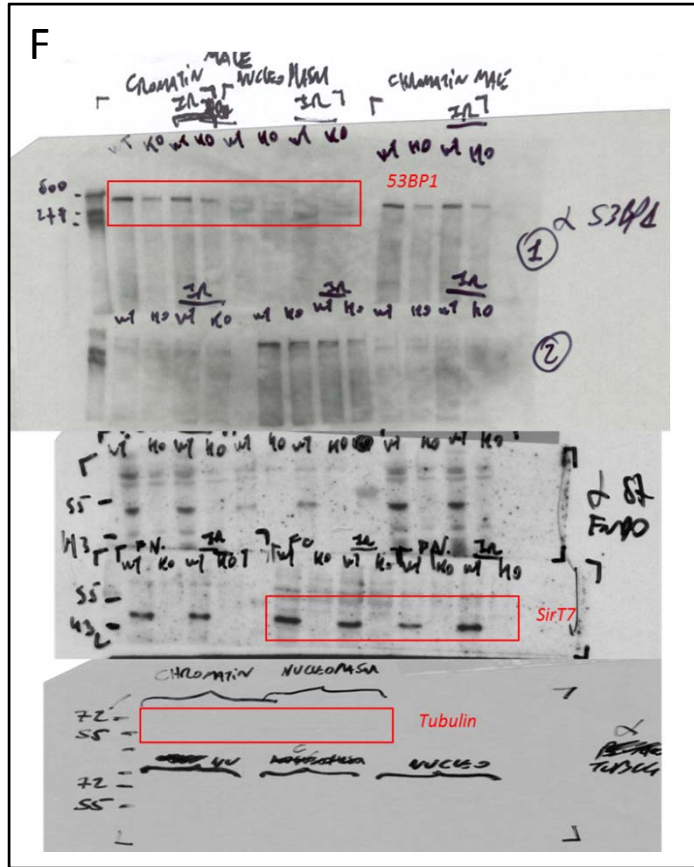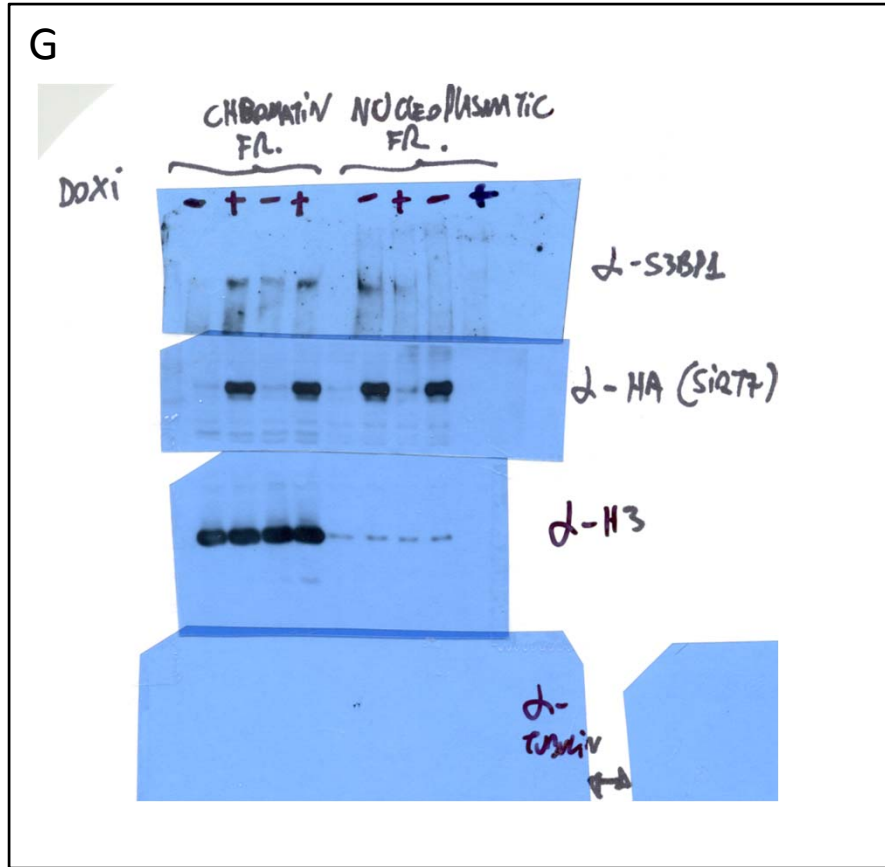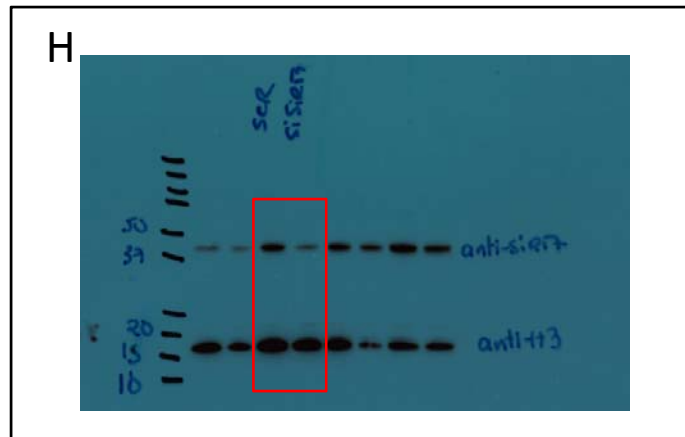

Supplement: EMBJ-35-1488-s005.pdf [file EMBJ-35-1488-s005.pdf]
